# Supplementary material for: Comparative Genomics and Transcriptional Analysis of Flavobacterium columnare Strain ATCC 49512
Source: Front Microbiol. 2017 Apr 19;8:588. doi: 10.3389/fmicb.2017.00588 (PMC5395568; doi:10.3389/fmicb.2017.00588)
Supplement: Supplementary Table 4 — Flavobacterium genus insertion elements. [file Table4.XLS]

## Sheet: F_branchiophilumFL15 
Flavobacterium branchiophilum FL-15 insertion elements
HOST: F_branchiophilumFL15
ACCESSION_NUMBER: NC_016001
SIZE: 3559884
orf_name	Similarity_AA	Family	orf_L_end	orf_R_end	orf_bp	aas	strand	Comments
orf_name	sim_pp1	family	orf_L	orf_R	orf_bp	aas	ori	comments
FBFL15_RS00135	64.13% ISPrsp1_aa1	IS1595 ssgr ISSod11	32307	31411	897	298	-
FBFL15_RS00380	51.55% ISSm4_aa2	ISL3	82391	83443	1053	350	+
FBFL15_RS00595	44.85% ISVsp2_aa1	IS1634	133609	131759	1851	616	-
FBFL15_RS00730	50.70% ISTvo4_aa1	IS1634	165093	166586	1494	497	+
FBFL15_RS00825	50.47% ISSm4_aa2	ISL3	185926	184934	993	330	-
FBFL15_RS15625	49.05% ISPa4_aa1	ISNCY	188771	186381	2391	796	-
FBFL15_RS01150	51.83% ISTvo4_aa1	IS1634	262185	263648	1464	487	+
FBFL15_RS01195	67.77% IS1168_aa1	IS5 ssgr IS5	271295	270642	654	217	-
FBFL15_RS01200	68.69% ISMex35_aa1	IS5 ssgr IS5	271680	271246	435	144	-
FBFL15_RS01295	50.90% ISCro4_aa1	IS110	290878	292029	1152	383	+
FBFL15_RS15630	64.06% ISPrsp1_aa1	IS1595 ssgr ISSod11	332732	333169	438	145	+
FBFL15_RS15635	73.68% ISPrsp1_aa1	IS1595 ssgr ISSod11	333200	333445	246	81	+
FBFL15_RS01945	68.85% ISWz1_aa1	IS91	450414	450217	198	65	-	| probable false positive |
FBFL15_RS02550	49.54% ISBce16_aa2	IS21	599486	598059	1428	475	-	| probable false positive |
FBFL15_RS02660	50.90% ISCro4_aa1	IS110	620054	618903	1152	383	-
FBFL15_RS03250	50.90% ISCro4_aa1	IS110	754132	755283	1152	383	+
FBFL15_RS03480	45.65% ISMae37_aa1	ISL3	803569	804414	846	281	+
FBFL15_RS03940	52.99% ISWz1_aa1	IS91	911276	912172	897	298	+	| probable false positive |
FBFL15_RS04125	54.76% ISAsp20_aa1	IS200/IS605 ssgr IS200	959904	959467	438	145	-
FBFL15_RS04295	40.4% ISSm4_aa1	ISL3	999890	1002136	2247	748	+
FBFL15_RS05630	57.23% ISPa7_aa1	IS1182	1302287	1303831	1545	514	+
FBFL15_RS05990	45.25% ISMae37_aa1	ISL3	1391882	1392727	846	281	+
FBFL15_RS06090	50.90% ISCro4_aa1	IS110	1414373	1415524	1152	383	+
FBFL15_RS06210	54.88% ISSm4_aa2	ISL3	1432633	1432217	417	138	-
FBFL15_RS06215	55.37% ISAsp20_aa1	IS200/IS605 ssgr IS200	1433237	1432776	462	153	-
FBFL15_RS06485	50.30% ISCro4_aa1	IS110	1489505	1488354	1152	383	-
FBFL15_RS06630	65.88% IS1169_aa1	IS5 ssgr IS5	1517516	1516479	1038	345	-
FBFL15_RS06765	64.13% ISPrsp1_aa1	IS1595 ssgr ISSod11	1559265	1558369	897	298	-
FBFL15_RS06870	49.06% ISRsp1_aa4	IS66	1585576	1586205	630	209	+	| probable false positive |
FBFL15_RS08095	64.13% ISPrsp1_aa1	IS1595 ssgr ISSod11	1880211	1881107	897	298	+
FBFL15_RS08695	50.30% ISCro4_aa1	IS110	2010533	2011684	1152	383	+
FBFL15_RS09045	54.88% ISMba2_aa3	IS1	2104722	2105141	420	139	+
FBFL15_RS09090	55.29% ISKpn25_aa3	ISL3	2118778	2115740	3039	1012	-
FBFL15_RS09105	62.5% ISKpn25_aa2	ISL3	2123199	2121922	1278	425	-
FBFL15_RS09120	49.30% ISKpn25_aa1	ISL3	2126756	2124408	2349	782	-
FBFL15_RS09195	59.01% ISAsp20_aa1	IS200/IS605 ssgr IS200	2143845	2143384	462	153	-
FBFL15_RS09910	46.02% ISKpn25_aa1	ISL3	2288517	2290097	1581	526	+	pseudogene
FBFL15_RS09915	38.62% ISSm4_aa4	ISL3	2290720	2292132	1413	470	+	pseudogene
FBFL15_RS09925	50.90% ISCro4_aa1	IS110	2293720	2292569	1152	383	-
FBFL15_RS11595	43.26% ISWz1_aa1	IS91	2673143	2672070	1074	357	-	| probable false positive |
FBFL15_RS11610	50.33% ISWz1_aa1	IS91	2676236	2675097	1140	379	-	| probable false positive |
FBFL15_RS11660	64.13% ISPrsp1_aa1	IS1595 ssgr ISSod11	2685446	2686342	897	298	+
FBFL15_RS11750	50.90% ISCro4_aa1	IS110	2702568	2701417	1152	383	-
FBFL15_RS12230	53.37% ISAcma32_aa1	IS630	2834499	2835011	513	170	+
FBFL15_RS12285	57.23% ISPa7_aa1	IS1182	2855609	2854065	1545	514	-
FBFL15_RS12570	54.78% ISWz1_aa1	IS91	2918844	2917939	906	301	-	| probable false positive |
FBFL15_RS12730	58.02% ISSm4_aa2	ISL3	2950963	2951310	348	115	+
FBFL15_RS12760	64.13% ISPrsp1_aa1	IS1595 ssgr ISSod11	2954837	2955733	897	298	+
FBFL_ISf_3	45% TnShfr1_aa1	Tn3	2973831	2974427	597	198	+	| probable false positive |
FBFL15_RS13315	59.09% ISWz1_aa1	IS91	3076226	3075906	321	106	-	| probable false positive |
FBFL15_RS14330	59.37% ISDba1_aa1	IS3 ssgr IS407	3292503	3292817	315	104	+
FBFL15_RS14335	60.67% ISKol7_aa2	IS3 ssgr IS150	3293000	3293335	336	111	+
FBFL_ISf_2	55.88% ISYps8_aa2	IS3 ssgr IS407	3293395	3293697	303	100	+
FBFL15_RS14520	45.25% ISMae37_aa1	ISL3	3329938	3329093	846	281	-
FBFL15_RS15230	45.28% ISMae37_aa1	ISL3	3473612	3472767	846	281	-
FBFL15_RS15525	0% newcandidate	New_Family	3539736	3539290	447	149	-	putative new IS family or false positive

## Sheet: F__indicum_GPTSA100 
Flavobacterium indicum GPTSA100 insertion elements
HOST: F__indicum_GPTSA100
ACCESSION_NUMBER: NC_017025
SIZE: 2993089
orf_name	Similarity_AA	Family	orf_L_end	orf_R_end	orf_bp	aas	strand	Comments
orf_name	sim_pp1	family	orf_L	orf_R	orf_bp	aas	ori	comments
KQS_RS00575	69.85% ISLbl1_aa2	IS3 ssgr IS3	129242	128364	879	292	-
KQS_RS00580	77.31% ISLbl1_aa1	IS3 ssgr IS3	129538	129239	300	99	-
KQS_RS00900	51.15% IS1N_aa3	IS1	188215	187553	663	220	-
KQS_RS01325	61.99% ISCaa7_aa1	IS110	305097	306092	996	331	+
KQS_RS01435	56.47% ISMno24_aa2	IS91	331006	329969	1038	345	-	| probable false positive |
KQS_RS01740	0% newcandidate	New_Family	411072	411638	567	189	+	putative new IS family or false positive
KQS_RS03585	52.25% ISBce16_aa2	IS21	819033	817603	1431	476	-	| probable false positive |
KQS_RS04865	62.26% ISCaa7_aa1	IS110	1083032	1084027	996	331	+
KQS_RS04885	64.77% ISCaa14_aa1	IS110	1086544	1087518	975	324	+
KQS_RS04975	64.77% ISCaa14_aa1	IS110	1102606	1103580	975	324	+
KQS_RS05005	64.77% ISCaa14_aa1	IS110	1107555	1108529	975	324	+
KQS_RS06810	59.05% ISMba2_aa3	IS1	1511266	1511685	420	139	+
KQS_RS07475	47.28% ISKpn25_aa1	ISL3	1642603	1641125	1479	492	-
KQS_RS07555	49.48% ISMno24_aa2	IS91	1663349	1662324	1026	341	-	| probable false positive |
KQS_RS07635	69.85% ISLbl1_aa2	IS3 ssgr IS3	1683766	1682888	879	292	-
KQS_RS07640	77.31% ISLbl1_aa1	IS3 ssgr IS3	1684062	1683763	300	99	-
KQS_RS07720	67.24% ISCARN78_aa2	IS21	1699061	1698708	354	117	-
KQS_RS14015	54.68% ISIde2_aa1	IS21	1699855	1699079	777	258	-
KQS_RS14020	58.56% ISPre4_aa1	IS21	1700660	1699860	801	266	-
KQS_RS07740	77.31% ISLbl1_aa1	IS3 ssgr IS3	1703978	1704277	300	99	+
KQS_RS07745	69.85% ISLbl1_aa2	IS3 ssgr IS3	1704274	1705152	879	292	+
KQS_RS07970	69.85% ISLbl1_aa2	IS3 ssgr IS3	1749452	1748574	879	292	-
KQS_RS07975	77.31% ISLbl1_aa1	IS3 ssgr IS3	1749748	1749449	300	99	-
KQS_RS09745	52.43% ISWz1_aa1	IS91	2105518	2104607	912	303	-	| probable false positive |
KQS_RS10695	50% ISWz1_aa1	IS91	2295875	2294982	894	297	-	| probable false positive |
KQS_RS13855	55.59% TnShfr1_aa1	Tn3	2989836	2988934	903	300	-	| probable false positive |

## Sheet: F__johnsoniae_UW101
Flavobacterium johnsoniae UW101 insertion elements
HOST: F__johnsoniae_UW101
ACCESSION_NUMBER: NC_009441
SIZE: 6096872
orf_name	Similarity_DNA	Similarity_AA	Family	orf_L_end	orf_R_end	orf_bp	aas	strand	Comments
orf_name	sim_dna	sim_pp1	family	orf_L	orf_R	orf_bp	aas	ori	comments
FJOH_RS00510		51.58% ISAsp20_aa1	IS200/IS605 ssgr IS200	92674	93105	432	143	+
FJOH_RS00690		50.18% ISShvi3_aa1	IS91	132701	131805	897	298	-	| probable false positive |
FJOH_RS04710		55.37% ISAsp20_aa1	IS200/IS605 ssgr IS200	1019560	1019126	435	144	-
FJOH_RS04785		65.47% ISBun1_aa1	IS1595 ssgr ISNwi1	1033466	1032531	936	311	-
FJOH_RS04965		58.67% ISAsp20_aa1	IS200/IS605 ssgr IS200	1062949	1063407	459	152	+
FJOH_RS10045		48.78% ISTha3_aa2	IS91	2237136	2238029	894	297	+	| probable false positive |
FJOH_RS10750		0% newcandidate	New_Family	2444528	2443974	555	185	-	putative new IS family or false positive
FJOH_RS11400		54.28% ISAsp20_aa1	IS200/IS605 ssgr IS200	2643140	2643601	462	153	+
FJOH_RS13650		47.43% ISWz1_aa1	IS91	3131194	3132453	1260	419	+	| probable false positive |
FJOH_RS13665		70.87% ISFjo2_aa1	IS3 ssgr IS3	3134818	3133952	867	288	-
FJOH_RS13670		63.28% ISFjo2_aa1	IS3 ssgr IS3	3136204	3135092	1113	370	-
FJOH_RS13865		50.28% ISWz1_aa1	IS91	3185092	3186009	918	305	+	| probable false positive |
FJOH_RS13900		51.56% IS1SD_aa3	IS1	3189624	3190283	660	219	+
FJOH_RS13975		54.47% ISSm4_aa4	ISL3	3211437	3208411	3027	1008	-
FJOH_RS13990		48.60% ISSm4_aa3	ISL3	3214165	3213362	804	267	-
FJOH_RS15540		51.97% ISWen2_aa1	IS110	3544606	3543566	1041	346	-
FJOH_RS15665		48.62% ISSm4_aa2	ISL3	3573896	3572760	1137	378	-
FJOH_RS16070		48.87% TnShfr1_aa1	Tn3	3661225	3662013	789	262	+	| probable false positive |
FJOH_RS16670		58.39% ISFba1_aa1	IS1595	3832838	3832371	468	155	-
FJOH_RS18585		46.79% ISWz1_aa1	IS91	4287852	4286593	1260	419	-	| probable false positive |
FJOH_RS18675		59.49% ISVvu1_aa1	IS1	4307973	4307638	336	111	-	pseudogene
FJOH_RS18690		51.19% ISEic1_aa3	IS1	4310070	4309411	660	219	-
FJOH_RS18720		53.22% ISWz1_aa1	IS91	4314646	4313729	918	305	-	| probable false positive |
FJOH_RS18855		54.43% ISMno24_aa2	IS91	4336082	4335165	918	305	-	| probable false positive |
FJOH_RS19010		55.02% ISMno24_aa2	IS91	4366397	4365480	918	305	-	| probable false positive |
FJOH_RS19125		49.77% ISEic1_aa3	IS1	4386968	4386279	690	229	-
FJOH_RS19165		49.13% ISWz1_aa1	IS91	4392727	4391810	918	305	-	| probable false positive |
FJOH_RS19220		44.04% ISMno24_aa2	IS91	4402883	4401966	918	305	-	| probable false positive |
FJOH_RS19565		100% ISFjo2_aa1	IS3 ssgr IS3	4480141	4480953	813	270	+
FJOH_RS19570		55.49% ISFjo2_aa1	IS3 ssgr IS3	4481018	4481596	579	192	+
FJOH_RS21455		52% ISAsp20_aa1	IS200/IS605 ssgr IS200	4984264	4983803	462	153	-
FJOH_ISf_11		58.20% TnAs1_aa2	Tn3	5209602	5209994	393	130	+	| probable false positive |
FJOH_RS22715		44.89% ISSm4_aa1	ISL3	5297019	5298566	1548	515	+
FJOH_RS22730		36.11% ISSm4_aa4	ISL3	5301031	5304138	3108	1035	+
FJOH_ISf_12		69.86% IS240B_aa1	IS6	5307088	5306873	216	71	-
FJOH_ISf_4		57.14% ISPko6_aa1	IS6	5307233	5307066	168	55	-
FJOH_RS26375		71.21% ISCca2_aa1	IS6	5307483	5307259	225	74	-
FJOH_RS22890		53.60% ISLbl1_aa1	IS3 ssgr IS3	5336599	5336889	291	96	+
FJOH_RS23050		74.05% ISLbl1_aa2	IS3 ssgr IS3	5377723	5377100	624	207	-

## Sheet: F_psychrophilum_JIP02_86
Flavobacterium psychrophilum JIP02-86 insertion elements
HOST: F_psychrophilum_JIP02_86
ACCESSION_NUMBER: AM398681
SIZE: 2860382
orf_name	Similarity_AA	Family	orf_L_end	orf_R_end	orf_bp	aas	strand	Comments
orf_name	sim_pp1	family	orf_L	orf_R	orf_bp	aas	ori	comments
FP2516	50% ISKol4_aa2	IS3 ssgr IS150	325713	324868	846	281	-
FP2517	64.58% ISPae1_aa1	IS3 ssgr IS407	326075	325764	312	103	-
FP2518	70.56% IS195_aa1	IS982	358505	357612	894	297	-
FP2520	69.76% IS1414_aa1	IS256	535689	536891	1203	400	+
FP2521	64.58% ISPae1_aa1	IS3 ssgr IS407	635807	636118	312	103	+
FP2522	50% ISKol4_aa2	IS3 ssgr IS150	636169	637014	846	281	+
FP2523	69.76% IS1414_aa1	IS256	665912	667114	1203	400	+
FP2525	0% newcandidate	New_Family	673902	672649	1254	418	-	putative new IS family or false positive
FP2526	60.38% ISBbi1_aa1	IS1595	679889	678924	966	321	-
FP2527	93.14% ISFba2_aa1	IS982	743579	742695	885	294	-
FP2528	53.18% ISDsp2_aa2	IS3 ssgr IS407	744777	743932	846	281	-
FP2529	64.58% ISPae1_aa1	IS3 ssgr IS407	745139	744828	312	103	-
FP2531	42.98% ISMno24_aa2	IS91	825682	824537	1146	381	-	| probable false positive |
FP2532	0% newcandidate	New_Family	826229	825684	546	182	-	putative new IS family or false positive
FP2533	70.56% IS195_aa1	IS982	878313	879206	894	297	+
FP2534	47.30% ISWz1_aa1	IS91	984678	985880	1203	400	+	| probable false positive |
FP2535	93.14% ISFba2_aa1	IS982	1036208	1035324	885	294	-
FP2536	60.38% ISBbi1_aa1	IS1595	1120218	1119253	966	321	-
FP2538	69.76% IS1414_aa1	IS256	1120889	1122091	1203	400	+
FP2539	45.49% ISMae37_aa1	ISL3	1122863	1122114	750	249	-
FP2540	67.19% IS4351_aa1	IS30	1124324	1123344	981	326	-
FP2543	55.63% ISMba2_aa3	IS1	1171304	1171723	420	139	+
FP2544	72.89% ISPto5_aa1	ISAs1	1307277	1307603	327	108	+	pseudogene
FP2545	72.30% ISPto5_aa1	ISAs1	1307669	1307905	237	78	+	pseudogene
FP2546	71.83% ISEc39_aa1	IS256	1328021	1327161	861	286	-	pseudogene
FP2547	64.58% ISPae1_aa1	IS3 ssgr IS407	1328088	1328399	312	103	+
FP2548	50% ISKol4_aa2	IS3 ssgr IS150	1328450	1329295	846	281	+
FP2553	72.22% ISSoEn2_aa1	IS256	1610810	1609884	927	308	-	pseudogene
FP2020	52.38% ISWz1_aa1	IS91	1876188	1877087	900	299	+	| probable false positive |
FP2557	70.56% IS195_aa1	IS982	1977188	1976295	894	297	-
FP2136	57.41% ISMno24_aa2	IS91	2001615	2002658	1044	347	+	| probable false positive |
FP2558	69.76% IS1414_aa1	IS256	2023803	2025005	1203	400	+
FP2559	61.25% ISAmde1_aa1	IS1182	2031419	2032042	624	207	+	pseudogene
FP2560	69.76% IS1414_aa1	IS256	2033267	2032065	1203	400	-
FP2561	46.15% ISLlo2_aa1	IS1182	2035878	2034874	1005	334	-	pseudogene
FP2562	69.41% IS1414_aa1	IS256	2035981	2037030	1050	349	+	pseudogene
FP2563	50.98% ISGva1_aa1	IS256 ssgr IS1249	2037912	2037184	729	242	-	pseudogene
FP2564	50% ISKol4_aa2	IS3 ssgr IS150	2044932	2044087	846	281	-
FP2565	64.58% ISPae1_aa1	IS3 ssgr IS407	2045294	2044983	312	103	-
FP2566	64.58% ISPae1_aa1	IS3 ssgr IS407	2065173	2065484	312	103	+
FP2567	50% ISKol4_aa2	IS3 ssgr IS150	2065535	2066380	846	281	+
FP2568	69.76% IS1414_aa1	IS256	2069689	2068487	1203	400	-
FP2569	45.50% ISLlo2_aa1	IS1182	2070891	2072474	1584	527	+
FP2570	45.50% ISAmde1_aa1	IS1182	2076352	2077878	1527	508	+
FP2571	64.58% ISPae1_aa1	IS3 ssgr IS407	2080073	2080384	312	103	+
FP2572	50% ISKol4_aa2	IS3 ssgr IS150	2080435	2081280	846	281	+
FP2573	59.70% ISSoEn2_aa1	IS256	2086185	2086412	228	75	+	pseudogene
FP2574	63.76% ISPa46_aa1	IS256	2086479	2086745	267	88	+	pseudogene
FP2575	72.28% ISSoEn2_aa1	IS256	2086766	2087548	783	260	+	pseudogene
FP2577	47.58% ISMae36_aa1	ISL3	2088524	2089369	846	281	+	pseudogene
FP2578	69.76% IS1414_aa1	IS256	2117346	2116144	1203	400	-
FP2579	0% newcandidate	New_Family	2197089	2195833	1257	419	-	putative new IS family or false positive
FP2580	50.98% ISGva1_aa1	IS256 ssgr IS1249	2249699	2248971	729	242	-	pseudogene
FP1189	51.47% ISWz1_aa1	IS91	2299356	2298460	897	298	-	| probable false positive |
FP1208	52.67% ISBce16_aa2	IS21	2322281	2323717	1437	478	+	| probable false positive |
FP2582	93.14% ISFba2_aa1	IS982	2522259	2523143	885	294	+
FP_ISf_4	56.96% ISBj5_B_aa1	IS5 ssgr IS5	2540975	2540517	459	152	-
FP2584	69.76% IS1414_aa1	IS256	2581772	2580570	1203	400	-
FP2587	94.39% ISFba2_aa1	IS982	2673762	2673436	327	108	-	pseudogene
FP2588	50.98% ISGva1_aa1	IS256 ssgr IS1249	2802723	2801995	729	242	-	pseudogene
FP2486	57.19% TnShfr1_aa1	Tn3	2859371	2858472	900	299	-	| probable false positive |
FP2585	0% newcandidate	New_Family	2633723	2634982	1260	420	+	putative new IS family or false positive
FP2586	0% newcandidate	New_Family	2659159	2659758	600	200	+	putative new IS family or false positive

## Sheet: F__columnare_49512 
Flavobacterium columnare 49512 insertion elements
HOST: F__columnare_49512
ACCESSION_NUMBER: IS_31041fcc
SIZE: 3162432
orf_name	Similarity_DNA	Similarity_AA	Family	orf_L_end	orf_R_end	orf_bp	aas	strand	Comments
orf_name	sim_dna	sim_pp1	family	orf_L	orf_R	orf_bp	aas	ori	comments
FCOL_00005		66.66% ISCaa5_aa1	IS982	846	16	831	276	-
FCOL_ISf_38		67.28% ISCaa5_aa1	IS982	52466	52786	321	106	+
FCOL_ISf_37		67.70% ISCaa5_aa1	IS982	52794	53276	483	160	+
FCOL_00560		65.26% ISCaa5_aa1	IS982	132554	132853	300	99	+
FCOL_ISf_11		46.96% ISEc39_aa1	IS256	172184	171066	1119	372	-
FCOL_01345		50.61% ISAcma28_aa3	IS630	324829	325326	498	165	+
FCOL_01350		56.68% ISMae27_aa1	IS630	325286	325831	546	181	+
FCOL_01845		53.71% ISCph13_aa1	IS5 ssgr IS5	432196	433197	1002	333	+
FCOL_01855		56.57% ISAcma28_aa3	IS630	433847	433581	267	88	-
FCOL_01865		57.80% ISMae27_aa1	IS630	434097	434708	612	203	+
FCOL_01945		67.04% ISSusp2_aa2	IS3 ssgr IS407	452346	451432	915	304	-
FCOL_01950		75% ISNoc1_aa1	IS3 ssgr IS407	452612	452346	267	88	-
FCOL_02250		52.32% ISMae6_aa1	IS5 ssgr IS5	519098	518277	822	273	-
FCOL_02340		70.94% ISNoc1_aa2	IS3 ssgr IS407	542329	541679	651	216	-
FCOL_02345		80.55% ISD1_aa1	IS3 ssgr IS407	542845	542606	240	79	-
FCOL_02615		43.69% ISSm4_aa1	ISL3	603200	605284	2085	694	+
FCOL_02620		44.79% ISKpn25_aa2	ISL3	605281	606549	1269	422	+
FCOL_02625		46.62% ISKpn25_aa3	ISL3	606551	609814	3264	1087	+
FCOL_02955		67.03% ISCaa5_aa1	IS982	677307	678137	831	276	+
FCOL_ISf_10		46.96% ISEc39_aa1	IS256	828585	827467	1119	372	-
FCOL_03675		67.03% ISCaa5_aa1	IS982	867792	866962	831	276	-
FCOL_03995		50.61% ISAcma28_aa3	IS630	933565	934062	498	165	+
FCOL_04000		59.02% ISMae27_aa1	IS630	934022	934534	513	170	+
FCOL_04270		58.33% ISMae27_aa1	IS630	998432	997920	513	170	-
FCOL_04275		50.61% ISAcma28_aa3	IS630	998889	998392	498	165	-
FCOL_04755		51.35% ISBce16_aa2	IS21	1136310	1134883	1428	475	-	| probable false positive |
FCOL_04800		53.03% ISWz1_aa1	IS91	1144474	1143566	909	302	-	| probable false positive |
FCOL_04955		67.03% ISCaa5_aa1	IS982	1175503	1174673	831	276	-
FCOL_05230		67.03% ISCaa5_aa1	IS982	1224822	1225652	831	276	+
FCOL_05430		52.04% ISMno24_aa2	IS91	1261926	1261123	804	267	-	| probable false positive |
FCOL_05530		84.63% ISFw3_aa1	IS481	1278960	1280072	1113	370	+
FCOL_05555		66.42% ISCps6_aa1	IS1182	1283552	1283965	414	137	+
FCOL_05565		46.96% ISMae37_aa1	ISL3	1284561	1285355	795	264	+
FCOL_05570		0% newcandidate	New_Family	1285348	1285614	267	89	+	putative new IS family or false positive
FCOL_05595		53.67% ISTha3_aa2	IS91	1290019	1291185	1167	388	+	| probable false positive |
FCOL_05660		67.03% ISCaa5_aa1	IS982	1312992	1313822	831	276	+
FCOL_05940		67.03% ISCaa5_aa1	IS982	1384867	1384037	831	276	-
FCOL_05955		50.61% ISAcma28_aa3	IS630	1387181	1387678	498	165	+
FCOL_05960		57.5% ISMae27_aa1	IS630	1387638	1388231	594	197	+
FCOL_05965		66.66% ISCaa5_aa1	IS982	1388266	1388691	426	141	+
FCOL_05970		66.66% ISCaa5_aa1	IS982	1388667	1389089	423	140	+
FCOL_06355		67.03% ISCaa5_aa1	IS982	1473642	1472812	831	276	-
FCOL_06370		66.66% ISCaa5_aa1	IS982	1476469	1476894	426	141	+
FCOL_06375		66.66% ISCaa5_aa1	IS982	1476870	1477292	423	140	+
FCOL_06970		57.11% ISPpu16_aa1	IS1182	1621610	1620126	1485	494	-
FCOL_06990		55.95% ISTha3_aa2	IS91	1625847	1624681	1167	388	-	| probable false positive |
FCOL_07035		65.71% ISCps6_aa1	IS1182	1631366	1630953	414	137	-
FCOL_07660		59.81% ISSm4_aa2	ISL3	1770957	1771958	1002	333	+
FCOL_07715		54.62% ISSm4_aa2	ISL3	1784940	1783855	1086	361	-
FCOL_ISf_9		46.96% ISEc39_aa1	IS256	1791159	1792277	1119	372	+
FCOL_ISf_26		60.86% ISKol2_aa1	IS256	1844725	1844453	273	90	-
FCOL_07920		64% ISPrsp1_aa1	IS1595 ssgr ISSod11	1845633	1844794	840	279	-
FCOL_07925		58.95% ISSne1_aa1	IS256	1846102	1845668	435	144	-
FCOL_07935		63.51% ISMae37_aa1	ISL3	1847048	1846590	459	152	-
FCOL_08300		56.33% ISArch12_aa1	ISL3	1924103	1923867	237	78	-
FCOL_08340		67.03% ISCaa5_aa1	IS982	1933550	1932720	831	276	-
FCOL_08555		67.03% ISCaa5_aa1	IS982	1982617	1983447	831	276	+
FCOL_08735		58.33% TnShfr1_aa1	Tn3	2027584	2026670	915	304	-	| probable false positive |
FCOL_ISf_36		53.84% ISCob1_aa1	IS256	2079498	2079725	228	75	+
FCOL_ISf_28		66.66% ISDet4_aa1	IS256	2079719	2079808	90	29	+
FCOL_ISf_1		65.25% IS1414_aa1	IS256	2079793	2080428	636	211	+
FCOL_ISf_20		72.72% ISKol2_aa1	IS256	2080418	2080615	198	65	+
FCOL_08875		48.17% ISMae37_aa1	ISL3	2081438	2080644	795	264	-
FCOL_09190		67.03% ISCaa5_aa1	IS982	2152015	2152845	831	276	+
FCOL_09285		47.59% IS1069_aa3	IS3 ssgr IS3	2175084	2176358	1275	424	+
FCOL_09540		67.04% ISNoc1_aa3	IS3 ssgr IS407	2234407	2233493	915	304	-
FCOL_09545		75% ISNoc1_aa1	IS3 ssgr IS407	2234673	2234407	267	88	-
FCOL_09875		55.61% ISWz1_aa1	IS91	2327858	2328892	1035	344	+	| probable false positive |
FCOL_09900		84.66% ISGdi10_aa1	IS481	2332557	2333465	909	302	+
FCOL_09905		63.15% ISCaa12_aa1	IS481	2333440	2333670	231	76	+
FCOL_10450		53.93% ISWz1_aa1	IS91	2470641	2469748	894	297	-	| probable false positive |
FCOL_10805		67.03% ISCaa5_aa1	IS982	2555001	2554171	831	276	-
FCOL_10930		84.05% ISFw3_aa1	IS481	2597598	2596486	1113	370	-
FCOL_11400		53.41% ISWpi18_aa1	IS4 ssgr IS4	2702929	2701931	999	332	-
FCOL_11425		44.94% ISMae36_aa1	ISL3	2706679	2707509	831	276	+
FCOL_11950		67.03% ISCaa5_aa1	IS982	2825191	2824361	831	276	-
FCOL_12355		65.71% ISCps6_aa1	IS1182	2905594	2905181	414	137	-
FCOL_12470		53.22% ISTha3_aa2	IS91	2927020	2926040	981	326	-	| probable false positive |
FCOL_12485		67.03% ISCaa5_aa1	IS982	2929451	2928621	831	276	-
FCOL_ISf_12		50% ISEc39_aa1	IS256	2941855	2942220	366	121	+
FCOL_ISf_35		47.2% ISCbe6_aa1	IS256	2942205	2942954	750	249	+
FCOL_12550		81.35% ISLpn8_aa1	IS3 ssgr IS407	2942993	2943172	180	59	+
FCOL_12555		66.66% ISSusp2_aa3	IS3 ssgr IS407	2943259	2944173	915	304	+
FCOL_12775		53.27% ISSpe1_aa2	IS3 ssgr IS3	2994560	2994910	351	116	+
FCOL_12785		81.35% ISLpn8_aa1	IS3 ssgr IS407	2995308	2995487	180	59	+
FCOL_12790		66.66% ISSusp2_aa3	IS3 ssgr IS407	2995574	2996488	915	304	+
FCOL_13510		50% ISAcma28_aa3	IS630	3153546	3154043	498	165	+
FCOL_13515		58.92% ISMae27_aa1	IS630	3154003	3154614	612	203	+
FCOL_05520		0% newcandidate	New_Family	1277835	1278056	222	74	+	putative new IS family or false positive
